# Supplementary material for: A Genome-Wide Association Study Confirms VKORC1, CYP2C9, and CYP4F2 as Principal Genetic Determinants of Warfarin Dose
Source: PLOS journal article supplement (doi:10.1371/journal.pgen.1000433), 2009-03-19

## Supplementary Figure 2

Graphical summary of a GWA scan for incidence of over-anticoagulation. Horizontal axis is the genomic position, and vertical axis is minus the common logarithm of  $p$ -value. Red dots above the gray line indicate association of genome-wide significance ( $p < 1.5 \times 10^{-7}$ ). SNPs in the *VKORC1* locus, such as rs9923231 ( $p = 8.9 \times 10^{-9}$ ), attained genome-wide significance, but there were no significant association in other loci.

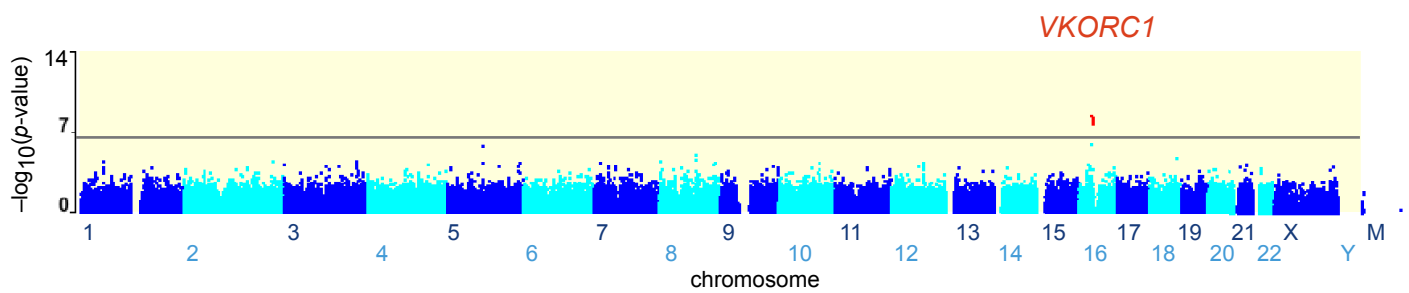

Supplement: S2 (10.1371/journal.pgen.1000433.s002) [file journal.pgen.1000433.s002]
